# Supplementary material
Source: publisher figshare collection journal article supplement (https://karger.figshare.com/ndownloader/files/17708429)
Supplement: Supplementary file 1 [file 17708429]

**Table S4. Univariable analysis of patient-specific associations with change in fetal fraction per days between blood sampling ((fetal fraction at Visit 2 – fetal fraction at Visit 1)/ (gestational age at Visit 2 – gestational age at Visit 1))**

**
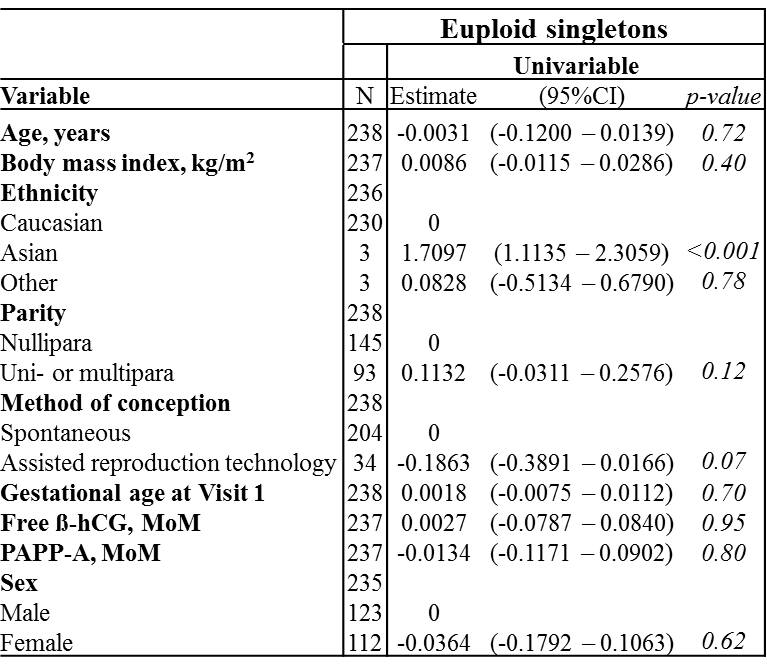
**

The table includes pregnancies with two samples with a fetal fraction at or above 4% (n=238)**.** Smoking status was excluded due to numbers (non-smokers, n=1).
